# Supplementary material for: Potential Interaction between WNT16 and Vitamin D on Bone Qualities in Adolescent Idiopathic Scoliosis Patients and Healthy Controls
Source: MDPI journal article supplement (doi:10.3390/biomedicines12010250), 2024-01-22
Supplement: s1 [file s1]

**Supplementary Table S1.** Allele frequencies of the selected SNPs in the clinical cohort

| SNP       | Gene  | Position    | Cytogenetic Band | Nature of SNP | Major Allele | Minor Allele | MAF of CHS from 1000 Genomes | MAF in Our Genetic Study |          |
|-----------|-------|-------------|------------------|---------------|--------------|--------------|------------------------------|--------------------------|----------|
|           |       |             |                  |               |              |              |                              | AIS Patients             | Controls |
| rs3801387 | Wnt16 | 7:121334711 | 7q31.31          | Intron        | A            | G            | 0.152                        | 0.124                    | 0.139    |
| rs2282679 | VDBP  | 4:71742666  | 4q13.3           | Intron        | T            | G            | 0.319                        | 0.253                    | 0.269    |
| rs2228570 | VDR   | 12:47879112 | 12q13.11         | start lost    | G            | A            | 0.386                        | 0.451                    | 0.470    |

MAF, minor allele frequency; CHS, Southern Han Chinese. All genotyped SNPs of all subjects in two cohorts were in Hardy–Weinberg equilibrium with  $p > 0.05$ .

**Supplementary Table S2.** Associations between clinical phenotypes and selected SNPs in the clinical cohort

| Clinical Phenotypes                                | Wnt16_rs3801387 (A/G) |                                 | VDBP_rs2282679 (A/C) |                                 | VDR_rs2228570 (G/A) |                                |
|----------------------------------------------------|-----------------------|---------------------------------|----------------------|---------------------------------|---------------------|--------------------------------|
|                                                    | <i>p</i> -Value       | OR (95% CI)* / $\beta$ (95% CI) | <i>p</i> -Value      | OR (95% CI)*/ $\beta$ (95% CI)  | <i>p</i> -Value     | OR (95% CI)*/ $\beta$ (95% CI) |
| AIS diagnosis <sup>a</sup>                         | 0.337                 | 0.832 (0.571–1.211) *           | 0.504                | 0.905 (0.675–1.213) *           | 0.510               | 0.916 (0.705–1.190) *          |
| Bone parameters                                    |                       |                                 |                      |                                 |                     |                                |
| Left FN aBMD <sup>b</sup>                          | 0.989                 | 0.000 (–0.017–0.017)            | 0.579                | 0.004 (–0.010–0.017)            | 0.743               | –0.002 (–0.014–0.010)          |
| Right FN aBMD <sup>b</sup>                         | 0.974                 | 0.000 (–0.017–0.017)            | 0.653                | 0.003 (–0.010–0.016)            | 0.664               | –0.003 (–0.014–0.009)          |
| Z-score of Left FN aBMD <sup>c</sup>               | 0.403                 | 0.066 (–0.089–0.222)            | 0.863                | –0.011 (–0.132–0.110)           | 0.769               | –0.016 (–0.124–0.091)          |
| Z-score of Right FN aBMD <sup>c</sup>              | 0.450                 | 0.060 (–0.096–0.216)            | 0.896                | 0.008 (–0.113–0.129)            | 0.948               | 0.004 (–0.104–0.111)           |
| Total vBMD (mg/mm <sup>3</sup> ) <sup>b</sup>      | 0.182                 | 7.006 (–3.303–17.315)           | 0.968                | –0.163 (–8.260–7.934)           | 0.510               | 2.411 (–4.777–9.598)           |
| Total bone area (mm <sup>2</sup> ) <sup>b</sup>    | 0.293                 | –2.576 (–7.383–2.231)           | 0.257                | 2.171 (–1.592–5.934)            | 0.243               | –1.992 (–5.341–1.356)          |
| Cortical vBMD (mg/mm <sup>3</sup> ) <sup>b</sup>   | 0.191                 | 7.881 (–3.933–19.695)           | 0.678                | 1.961 (–7.324–11.246)           | 0.308               | 4.283 (–3.957–12.522)          |
| Cortical thickness (mm) <sup>b</sup>               | 0.274                 | 0.021 (–0.017–0.058)            | 0.751                | 0.005 (–0.025–0.034)            | 0.486               | 0.009 (–0.017–0.036)           |
| Cortical area (mm <sup>2</sup> ) <sup>b</sup>      | 0.330                 | 0.941 (–0.956–2.838)            | 0.414                | 0.621 (–0.870–2.113)            | 0.797               | 0.174 (–1.150–1.497)           |
| Cortical bone perimeter (mm) <sup>b</sup>          | 0.392                 | –0.322 (–1.061–0.417)           | 0.212                | 0.369 (–0.211–0.949)            | 0.225               | –0.317 (–0.831–0.196)          |
| Trabecular vBMD (mg/mm <sup>3</sup> ) <sup>b</sup> | 0.384                 | 2.246 (–2.820–7.312)            | 0.797                | 0.524 (–3.467–4.514)            | 0.919               | –0.182 (–3.700–3.337)          |
| BV/TV <sup>b</sup>                                 | 0.389                 | 0.002 (–0.002–0.006)            | 0.802                | 0.000 (–0.003–0.004)            | 0.915               | 0.000 (–0.003–0.003)           |
| Trabecular Number (mm <sup>–1</sup> ) <sup>b</sup> | 0.410                 | 0.019 (–0.026–0.063)            | 0.513                | 0.012 (–0.023–0.046)            | 0.685               | –0.006 (–0.037–0.025)          |
| Trabecular Thickness (mm) <sup>b</sup>             | 0.889                 | 0.000 (–0.002–0.002)            | 0.725                | 0.000 (–0.002–0.001)            | 0.821               | 0.000 (–0.001–0.001)           |
| Trabecular Area (mm <sup>2</sup> ) <sup>b</sup>    | 0.282                 | –2.831 (–7.993–2.331)           | 0.455                | 1.541 (–2.506–5.588)            | 0.368               | –1.649 (–5.247–1.949)          |
| Trabecular Separation (mm) <sup>b</sup>            | 0.488                 | –0.006 (–0.025–0.012)           | 0.516                | –0.005 (–0.019–0.010)           | 0.706               | 0.002 (–0.010–0.015)           |
| Serum 25(OH)Vit-D level <sup>d</sup>               | 0.039                 | 3.635 (0.180–7.089)             | <b>&lt;0.001</b>     | <b>–4.844</b><br>(–7.521–2.167) | 0.392               | 1.046 (–1.355–3.448)           |

AIS, adolescent idiopathic scoliosis; FN, femoral neck; aBMD, areal bone mineral density; vBMD, volumetric bone mineral density; BV/TV, trabecular bone volume to tissue volume ratio; Vit-D; vitamin D; OR, odds ratio; CI, confidence interval.  $p < 0.0167$  regarded as significant after Bonferroni correction. a, analyzed by binary logistic regression, fitting age as covariates. b, analyzed by linear regression, fitting age, AIS diagnosis, arm span, body weight, breast stage, and pubic hair stage as covariates. c, analyzed by linear regression, fitting AIS diagnosis, arm span, body weight, breast stage, and pubic hair stage as covariates. d, analyzed by linear regression, fitting age, and AIS diagnosis as covariates.
